# Supplementary material
Source: MDPI journal article supplement (https://www.mdpi.com/2072-4292/7/3/2942)
Supplement: s1 [file s1]

*Supplementary Information***Validation of a Simplified Model to Generate Multispectral Synthetic Images. 2015, 7, 2942–2951****Ion Sola \*, María González-Audícana and Jesús Álvarez-Mozos**

Department of Projects and Rural Engineering, Campus Arrosadía, Public University of Navarre, 31006, Pamplona, Spain; E-Mails: maria.audicana@unavarra.es (M.G.-A.); jesus.alvarez@unavarra.es (J.A.-M.)

\* Author to whom correspondence should be addressed; E-Mail: ion.sola@unavarra.es; Tel.: +34-948-168-401; Fax: +34-948-169-148.

---

This supplementary supports the main text as follows:

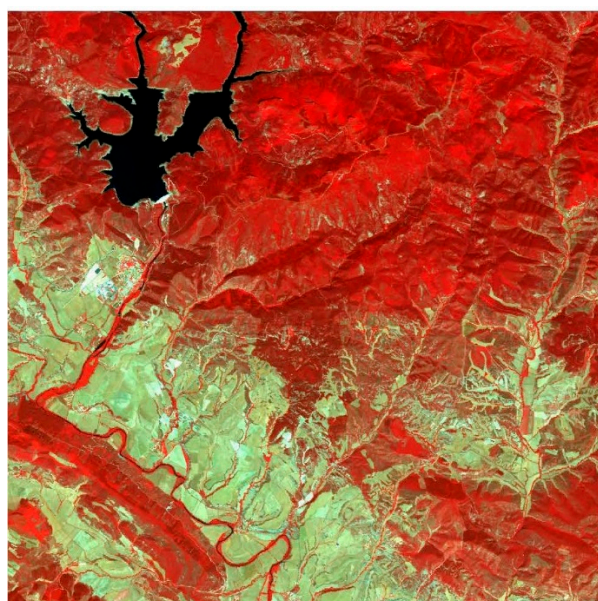

**(a)**

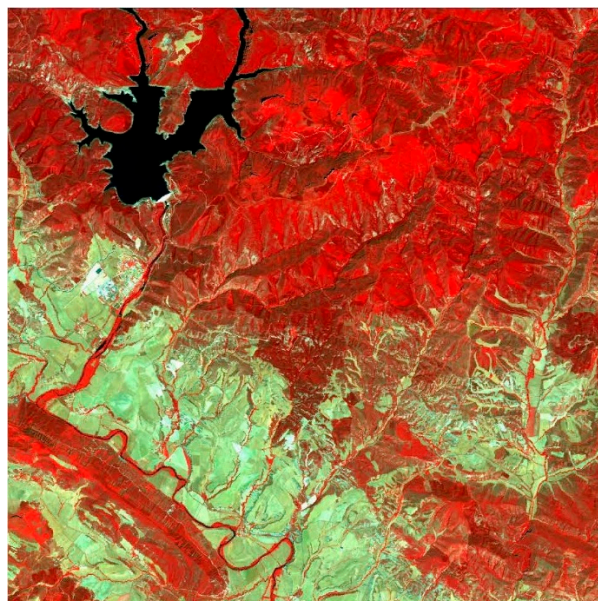

**(b)**

**Figure S1. Cont.**



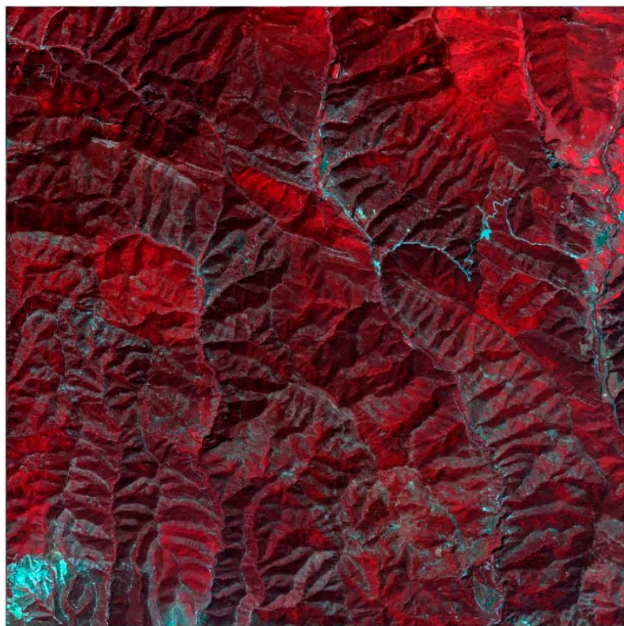

(c)

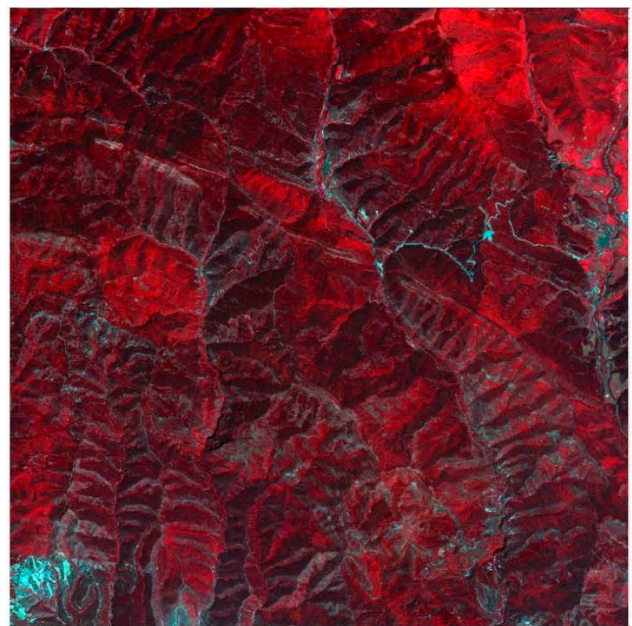

(d)

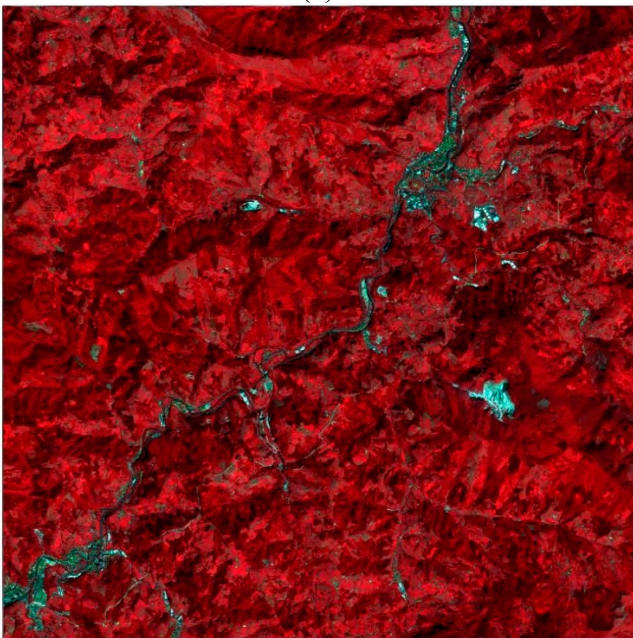

(e)

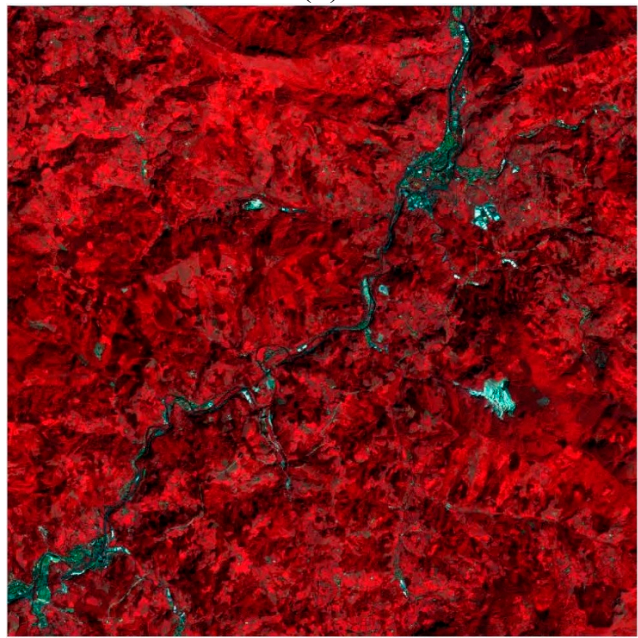

(f)

**Figure S1.** RGB false color composition of real and simulated scenes of (a) Area 2. Real (b) Area 2. Simulated (c) Area 3. Real (d) Area 3. Simulated (e) Area 4. Real (f) Area 4. Simulated.

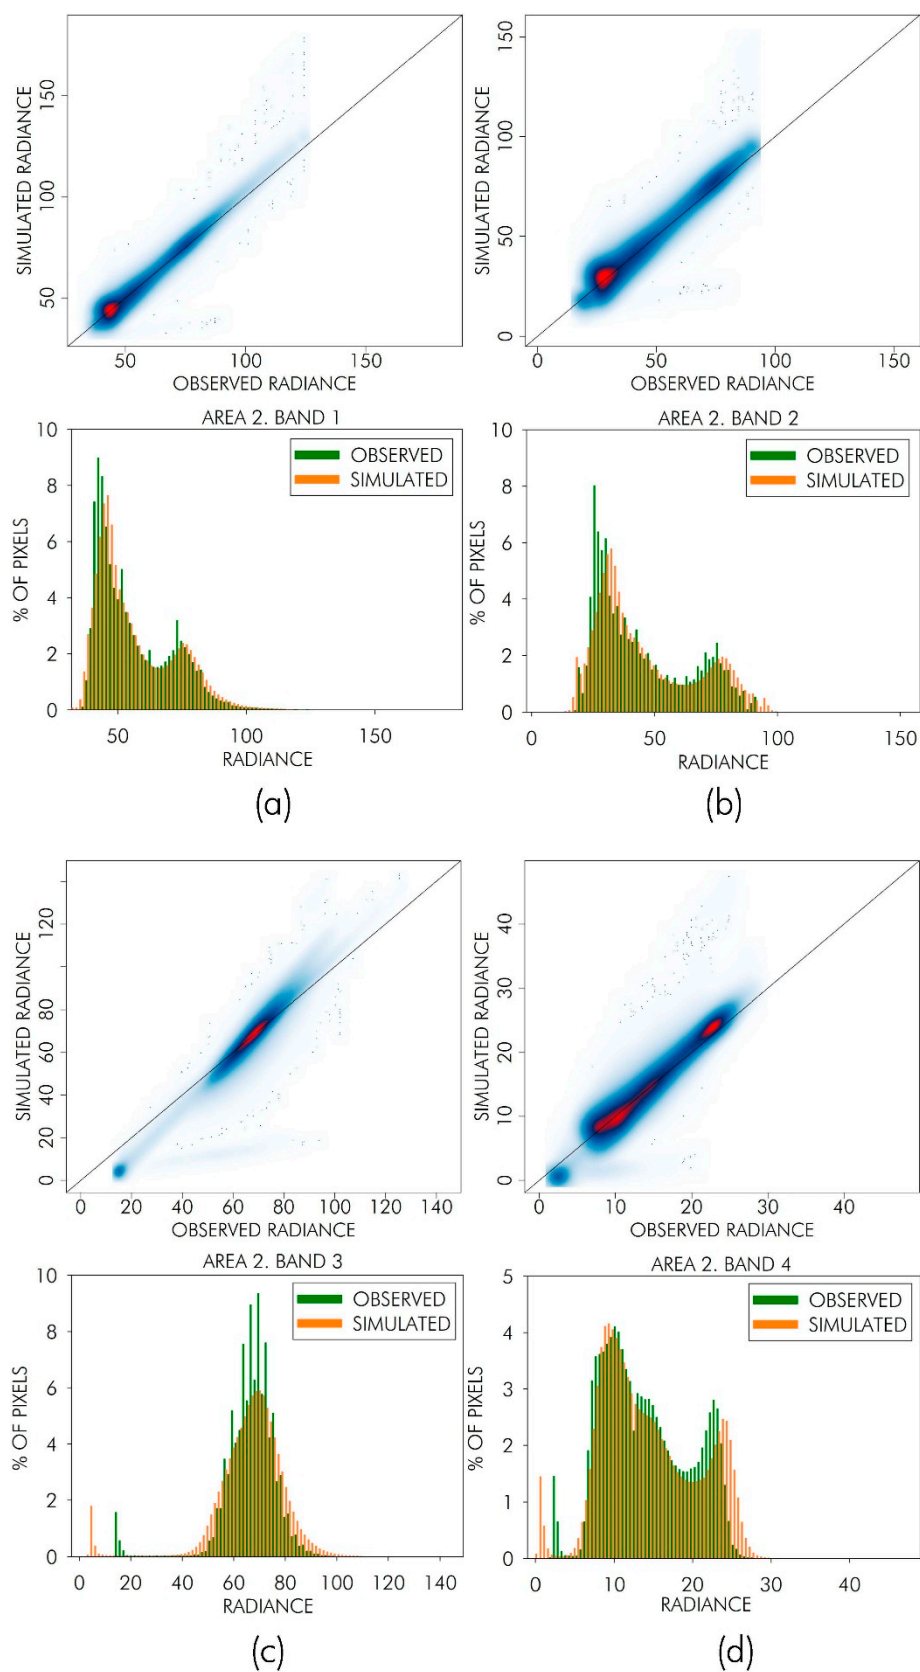

**Figure S2.** Results for area 2. Scatterplots and histograms of observed and simulated radiance (in units of  $\text{W} \cdot \text{m}^{-2} \cdot \text{sr}^{-1} \cdot \mu\text{m}^{-1}$ ) of (a) Band 1 (b) Band 2 (c) Band 3 (d) Band 4.



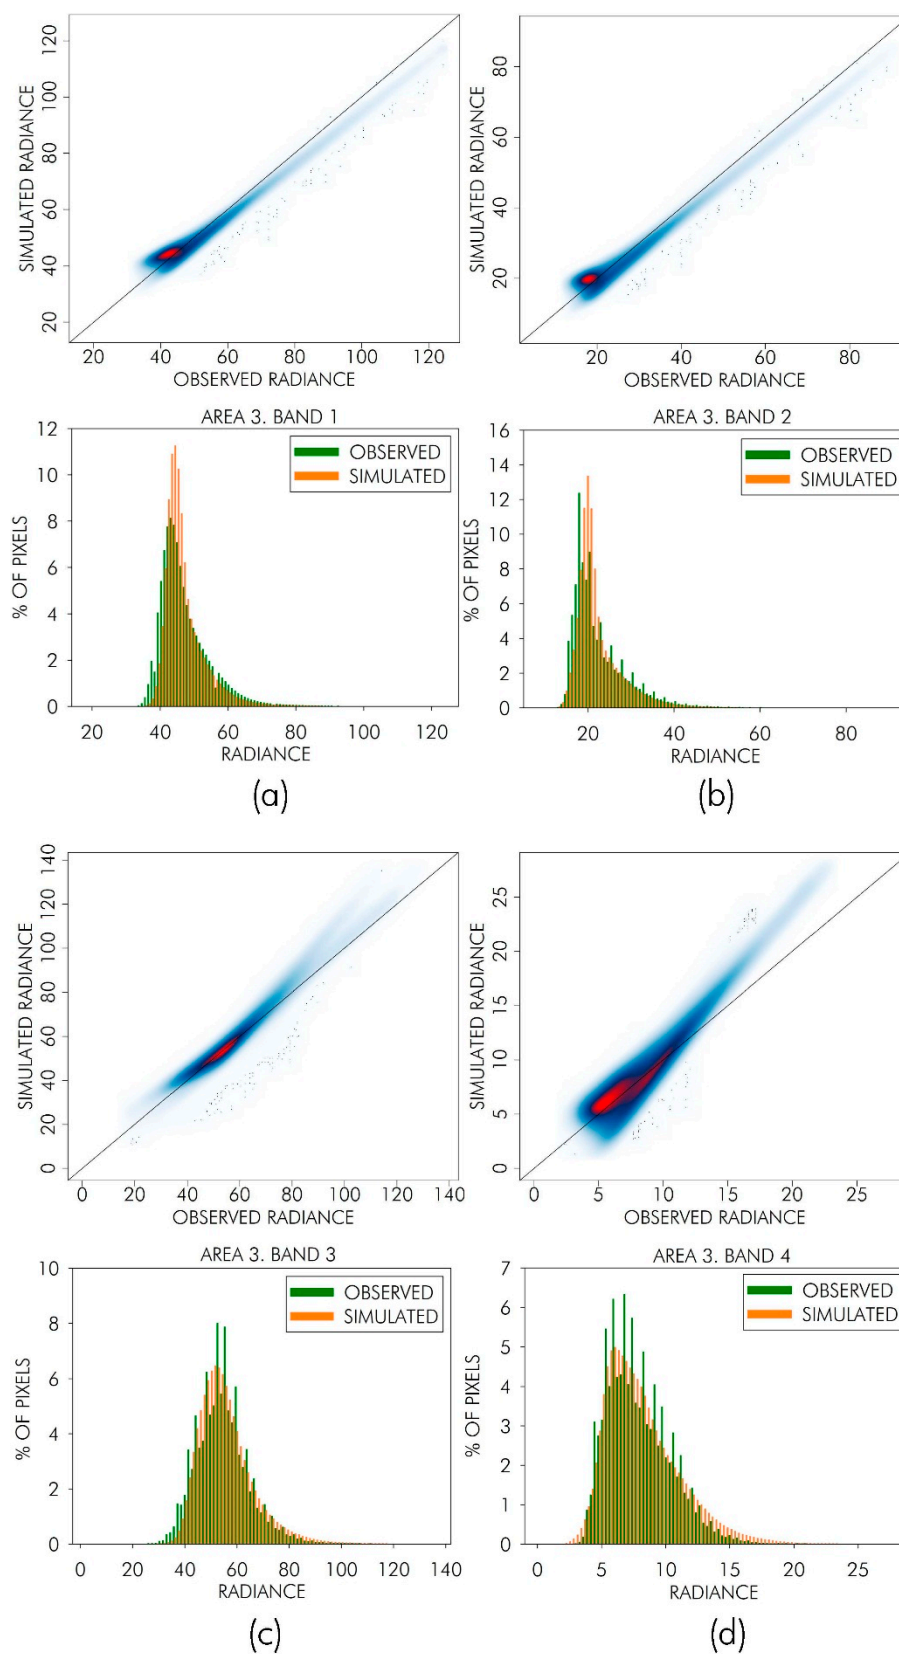

**Figure S3.** Results for area 3. Scatterplots and histograms of observed and simulated radiance (in units of  $\text{W} \cdot \text{m}^{-2} \cdot \text{sr}^{-1} \cdot \mu\text{m}^{-1}$ ) of (a) Band 1 (b) Band 2 (c) Band 3 (d) Band 4.



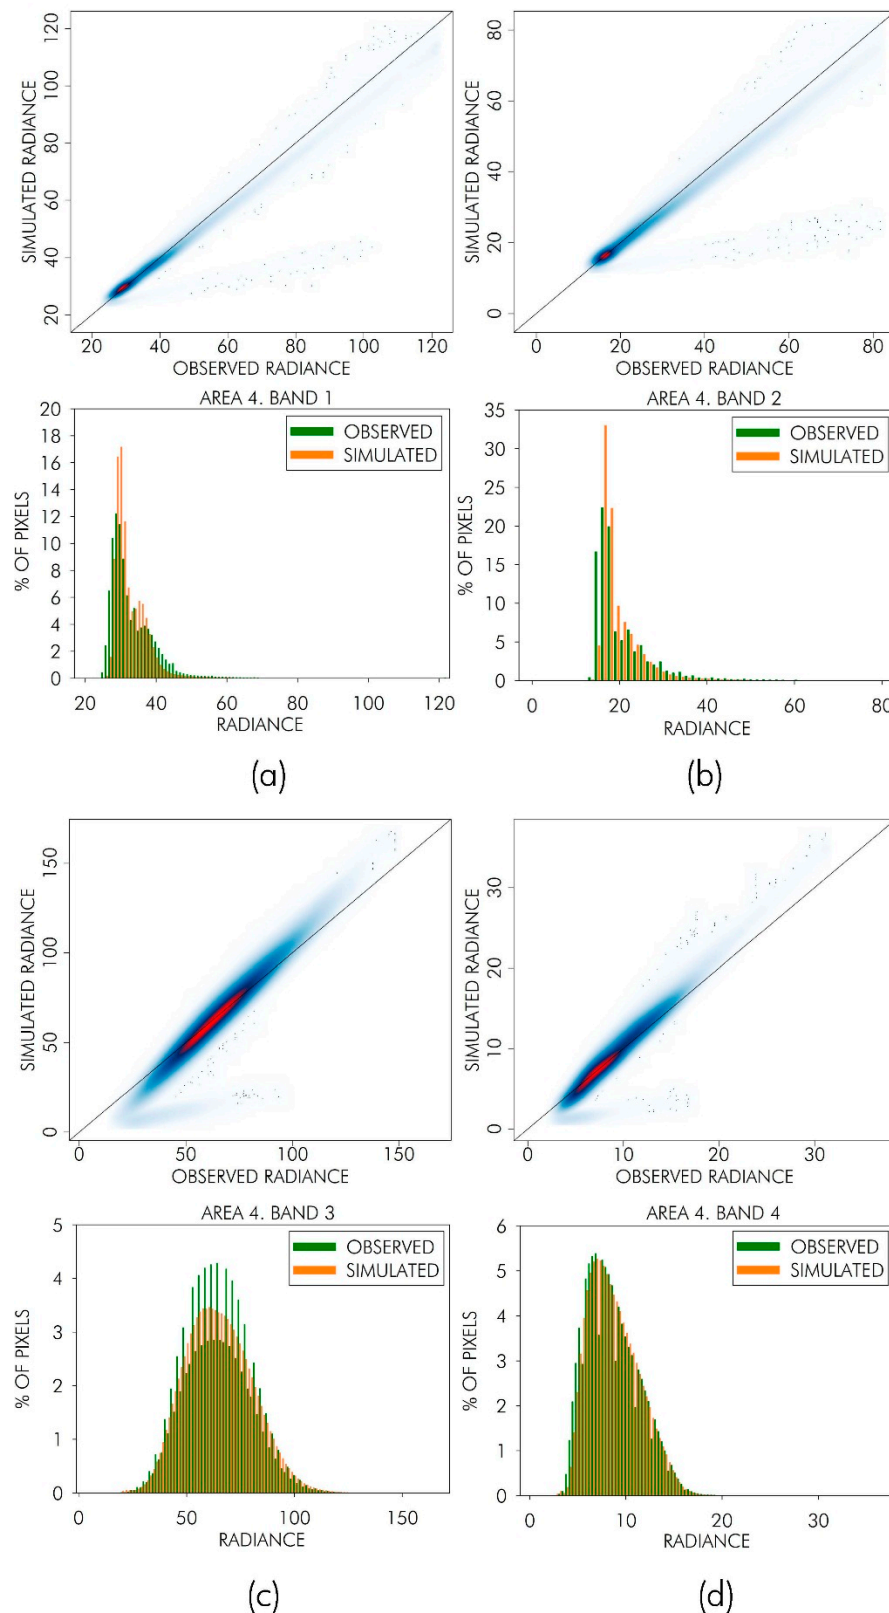

**Figure S4.** Results for area 4. Scatterplots and histograms of observed and simulated radiance (in units of  $\text{W} \cdot \text{m}^{-2} \cdot \text{sr}^{-1} \cdot \mu\text{m}^{-1}$ ) of (a) Band 1 (b) Band 2 (c) Band 3 (d) Band 4.
